# Supplementary material for: Association Between Serum Albumin and Mortality in Older People With Dysphagia: a Retrospective Cohort Study
Source: Research Square preprint supplement (doi:10.21203/rs.3.rs-1057186/v1), 2021-12-03
Supplement: Supplementary file 1 [file 52e751339c31ec9ab3adbbdb.docx]

|  | | | |  | | |
| --- | --- | --- | --- | --- | --- | --- |
| Suppplementary Table 1 Subgroup analysis between serum albumin and mortality | | | | | |
| Subgroup | N | Status（N%） | Adjusted HR（95%CI） | | P.for.interaction |
| PEG |  |  |  | | 0.363 |
| TPN | 73 | 62 (84.9) | 0.64 (0.36~1.15) | |  |
| PEG | 180 | 76 (42.2) | 0.86 (0.46~1.6) | |  |
| Sex |  |  |  | | 0.402 |
| Male | 99 | 70 (70.7) | 0.8 (0.39~1.65) | |  |
| Female | 154 | 68 (44.2) | 0.65 (0.35~1.2) | |  |
| Age |  |  |  | | 0.715 |
| <85 | 125 | 55 (44) | 1.38 (0.62~3.1) | |  |
| ≥85 | 128 | 83 (64.8) | 0.57 (0.35~0.92) | |  |

Because our article is a secondary analysis of the open data. As the text says: “Study approval was obtained from the Ethical Review Board of Miyanomori Memorial Hospital”[1].

**References:**

[1]. Masaki, S. and T. Kawamoto, Comparison of long-term outcomes between enteral nutrition via gastrostomy and total parenteral nutrition in older persons with dysphagia: A propensity-matched cohort study. PLoS One, 2019. 14(10): p. e0217120.
